# Supplementary material
Source: PubMed Central journal article supplement (PMC2884201)
Supplement: NIHMS186843-supplement-01.pdf [file NIHMS186843-supplement-01.pdf]

## Supplementary Information

### Figures

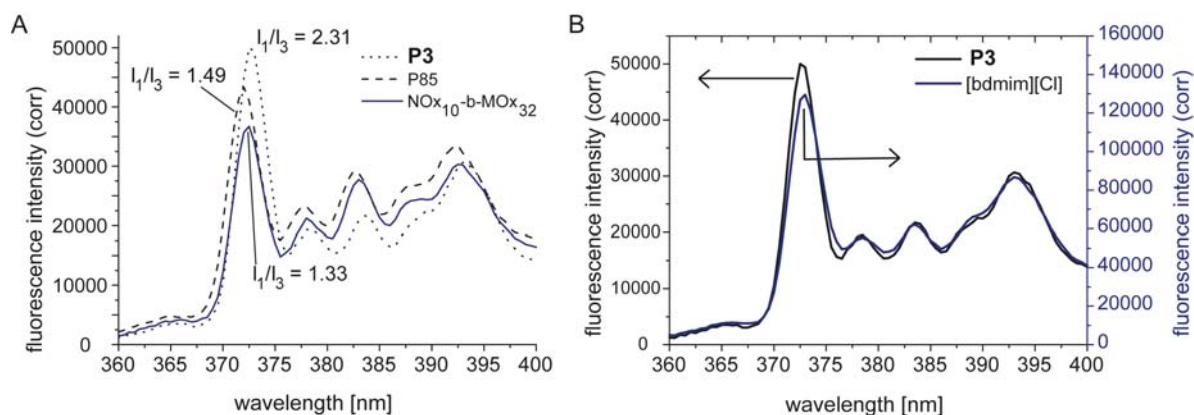

**Fig. S1.** A) Pyrene fluorescence spectra recorded at room temperature in aqueous solutions of 2-nonyl-2-oxazoline based block copolymer P[NO<sub>x</sub>10-b-MeO<sub>x</sub>32] ( $2.1 \times 10^{-4}$  M) [1], Pluronic P85 ( $2.2 \times 10^{-3}$  M) and the 2-butyl-2-oxazoline based MeO<sub>x</sub>36-b-BuO<sub>x</sub>30-b-MeO<sub>x</sub>36 (**P3**,  $7.1 \times 10^{-4}$  M). B) Comparison between pyrene fluorescence spectra in **P3** ( $7.1 \times 10^{-4}$  M) and the ionic liquid 1-butyl-2,3-dimethylimidazolium chloride ([bdmim]/[Cl]). For all experimental conditions were: [pyrene] =  $5 \times 10^{-7}$  M,  $\lambda_{\text{exc}}$  = 333 nm, pH 7.2.

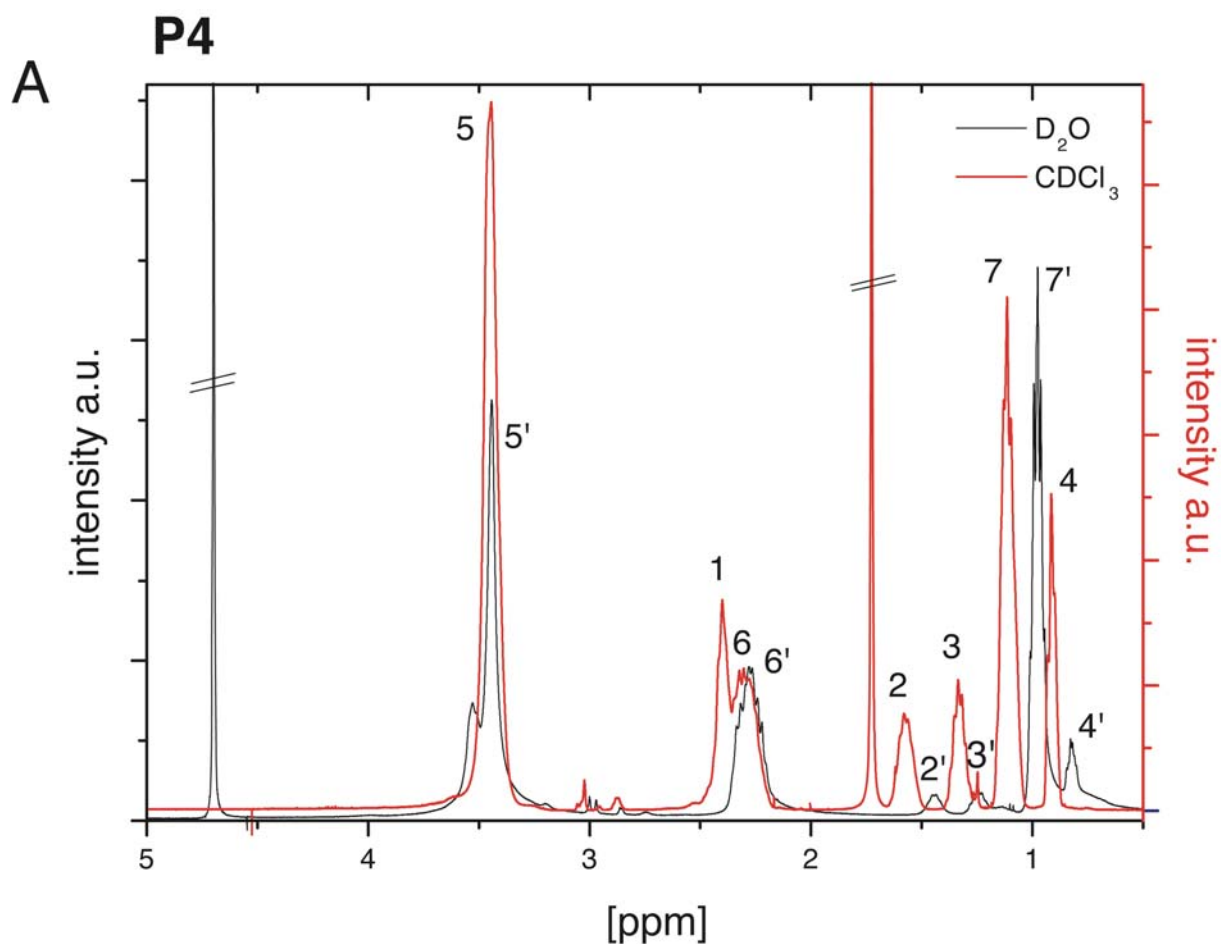

**Fig. S2.** Comparison of <sup>1</sup>H-NMR spectra of **P4** (300K, 400 MHz, normalized for methyl or ethyl side chain, respectively) in deuterated chloroform (no aggregates present) and D<sub>2</sub>O (formation of polymeric micelles). Signals 1-4 (CDCl<sub>3</sub>) and 1'-4' (D<sub>2</sub>O) originated from butyl side chains in the hydrophobic block of **P4** signals 5/5' from polymer main chain and 6/6' and 7/7' from side chains in the hydrophilic block.

Results **P1**

|                         | Diam. (nm)    | % Intensity | Width (nm) |
|-------------------------|---------------|-------------|------------|
| Z-Average (d.nm): 26.43 | Peak 1: 28.82 | 100.0       | 8.727      |
| Pdl: 0.077              | Peak 2: 0.000 | 0.0         | 0.000      |
| Intercept: 0.932        | Peak 3: 0.000 | 0.0         | 0.000      |

Result quality : **Good**

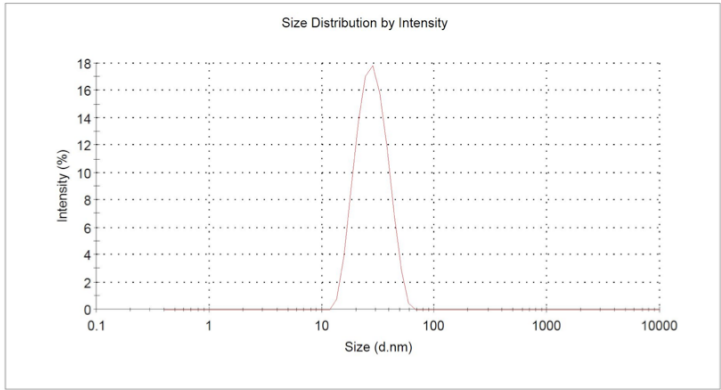

Results **P2**

|                         | Diam. (nm)    | % Intensity | Width (nm) |
|-------------------------|---------------|-------------|------------|
| Z-Average (d.nm): 20.72 | Peak 1: 21.96 | 100.0       | 5.567      |
| Pdl: 0.043              | Peak 2: 0.000 | 0.0         | 0.000      |
| Intercept: 0.942        | Peak 3: 0.000 | 0.0         | 0.000      |

Result quality : **Good**

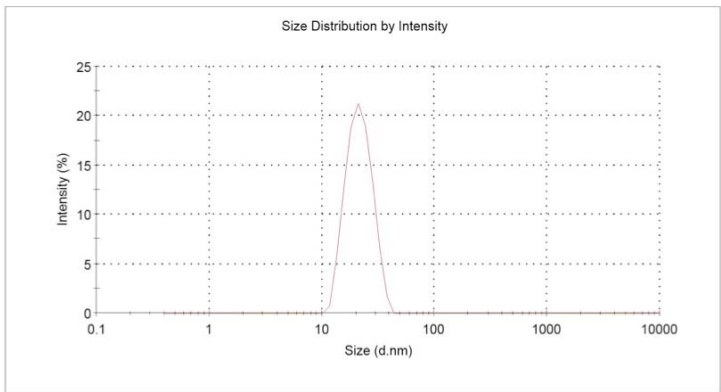

Results **P3**

|                         | Diam. (nm)    | % Intensity | Width (nm) |
|-------------------------|---------------|-------------|------------|
| Z-Average (d.nm): 37.79 | Peak 1: 43.13 | 100.0       | 14.78      |
| Pdl: 0.118              | Peak 2: 0.000 | 0.0         | 0.000      |
| Intercept: 0.957        | Peak 3: 0.000 | 0.0         | 0.000      |

Result quality : **Good**

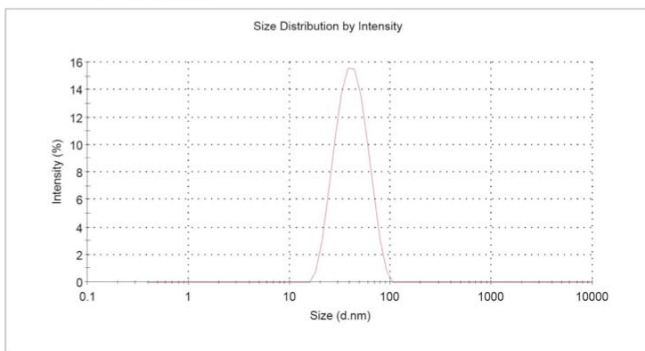

Results

### P3 + BSA

|                         | Diam. (nm)    | % Intensity | Width (nm) |
|-------------------------|---------------|-------------|------------|
| Z-Average (d.nm): 37.02 | Peak 1: 44.98 | 98.4        | 18.49      |
| PdI: 0.166              | Peak 2: 9.791 | 1.6         | 1.417      |
| Intercept: 0.957        | Peak 3: 0.000 | 0.0         | 0.000      |

Result quality : Good

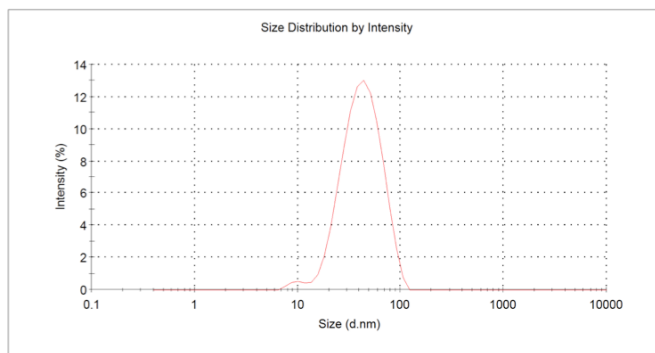

**Fig. S3.** Dynamic light scattering of drug loaded micelles of **P1** and **P2** (10 mg/mL), each 4mg/mL PTX and unloaded micelles of **P3** (5 mg/mL) in the presence and absence of 5 mg/mL bovine serum albumin (BSA).

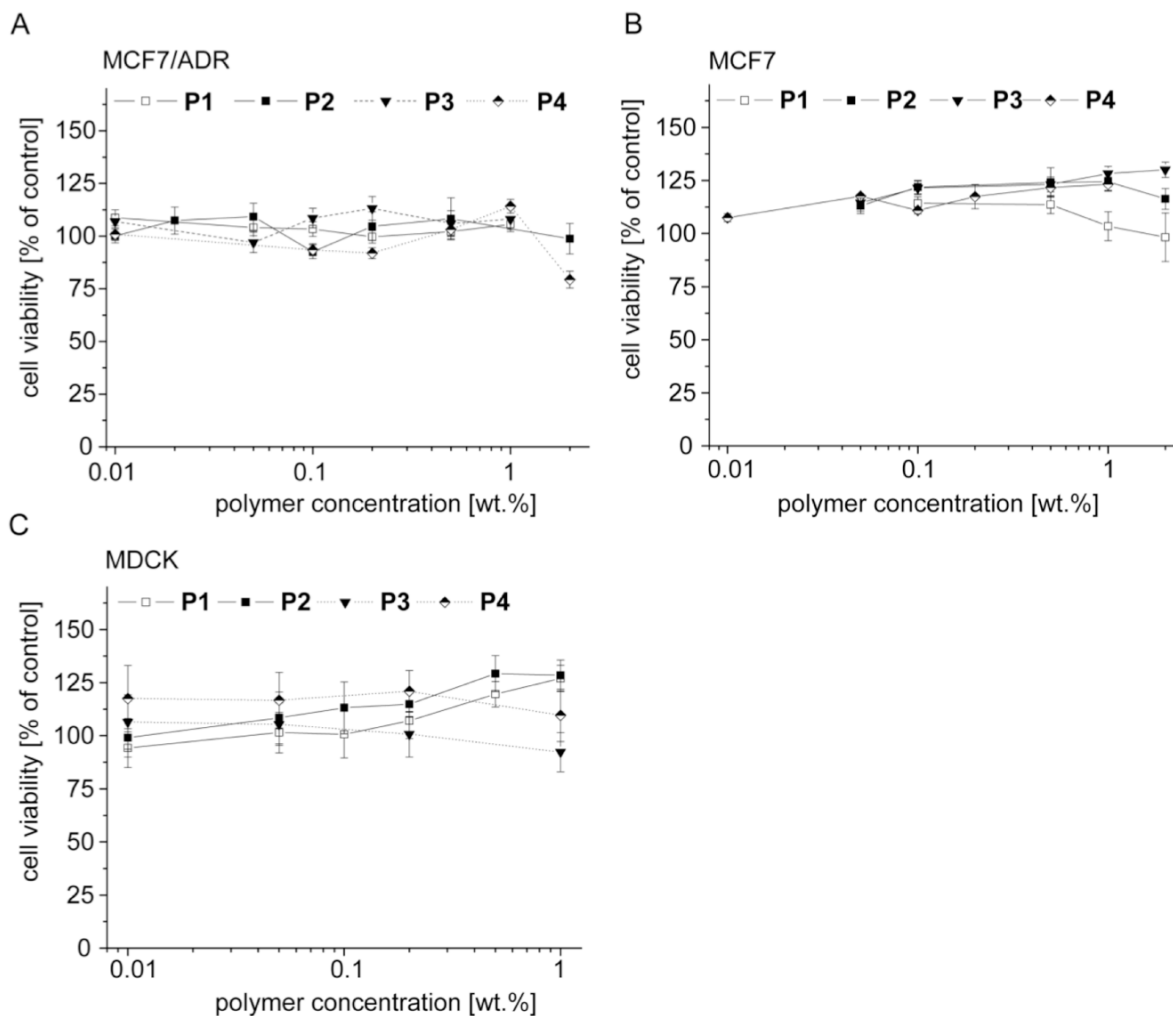

**Fig. S4.** Cytotoxicity of polymers **P1-P4** in A) multi-drug resistant (MCF7/ADR), B) non-resistant (MCF7) human adenocarcinoma cells and C) Madin-Darby canine kidney (MDCK) cells after incubation for 24 h (A) and 2 h (B,C). Data expressed as mean  $\pm$  SEM ( $n = 4$ ).

**Table S1:**  $I_1/I_3$  ratios of pyrene fluorescence spectra determined in the current work ( $\dagger$ ) and previous accounts in different solvents and polymer solutions (above cmc).

| Solvent / polymer solution                     | $I_1/I_3$                             |
|------------------------------------------------|---------------------------------------|
| Hexane/Cyclohexane [2]                         | 0.61 – 0.64 <sup>†</sup>              |
| 2-Nonyl-2-oxazoline based polymer <sup>§</sup> | 1.20 – 1.38 <sup>†</sup>              |
| Methanol [3]                                   | 1.336 – 1.50                          |
| Pluronic P85 [4]                               | 1.49 <sup>†</sup> – 1.69 <sup>§</sup> |
| Water [3]                                      | 1.75 – 1.96                           |

|                       |                                        |
|-----------------------|----------------------------------------|
| N,N-dimethylacetamide | 1.58 – 1.82                            |
| Acetonitrile [2]      | 1.85 – 1.88                            |
| DMSO [3]              | 1.90 – 2.03 <sup>†</sup>               |
| Ionic liquid [3]      | 1.84 <sup>#</sup> – 2.09 <sup>*†</sup> |
| <b>P1</b>             | 2.16 – 2.21 <sup>†</sup>               |
| <b>P2</b>             | 2.08 – 2.11 <sup>†</sup>               |
| <b>P3</b>             | 2.30 – 2.35 <sup>†</sup>               |
| <b>P4</b>             | 2.29 – 2.33 <sup>†</sup>               |

\* 1-butyl-2,3-dimethylimidazolium chloride

# 1-butyl-3-methylimidazolium hexafluorophosphate

§ graphically extracted from previous report [4]

§ The polymer P[(NO<sub>x</sub>)<sub>10</sub>(MO<sub>x</sub>)<sub>32</sub>] was used in this experiment [1].

## References:

- (1) Bonné TB, Lüdtkke K, Jordan R, Stepánek P, Papadakis CM. Aggregation behavior of amphiphilic poly (2-alkyl-2-oxazoline) diblock copolymers in aqueous solution studied by fluorescence correlation spectroscopy. *Colloid Polym Sci* 2004;282(8):833-43.
- (2) Kalyanasundaram K, Thomas JK. Environmental effects on vibronic band intensities in pyrene monomer fluorescence and their application in studies of micellar systems. *J Am Chem Soc* 1977;99(7):2039-44.
- (3) Fletcher KA, Storey IA, Hendricks AE, Pandey S. Behavior of the solvatochromic probes reichardt's dye, pyrene, dansylamide, Nile red and 1-pyrenecarbaldehyde within the room-temperature ionic liquid bmimpf<sub>6</sub>. *Green Chem* 2001;3(5):210-5.
- (4) Kabanov AV, Nazarova IR, Astafieva IV, Batrakova EV, Alakhov VY, Yaroslavov AA, et al. Micelle formation and solubilization of fluorescent probes in poly (oxyethylene-b-oxypropylene-b-oxyethylene) solutions. *Macromolecules* 1995;28(7):2303-14.
